# Supplementary material for: Synthesis of electron-withdrawing butane- and arene-sulfonylamino phosphines and use in rhodium-catalyzed hydroformylationDedicated to the memory of Mohammad Salman Hamdani. Sal worked in our labs at Queens College as an undergraduate student from 1998–2001, and died as part of the rescue effort at the World Trade Center in New York City, September 11, 2001.Electronic supplementary information (ESI) available: details of the syntheses, purification, and NMR and analytical data. See http://www.rsc.org/suppdata/dt/b2/b208089c/
Source: Royal Society of Chemistry journal article supplement (doi:10.1039/b208089c), 2002-12-20
Supplement: b208089c.doc [file b208089c.doc]

Synthesis of Electron-Withdrawing Butane- and Arene-sulfonylamino Phosphines and Use in Rhodium-Catalyzed Hydroformylation

Matthew P. Magee, Huan-Qiu Li, Oma Morgan, and William H. Hersh*

Department of Chemistry and Biochemistry, Queens College and the Graduate Center of the City University of New York, Flushing, NY 11367-1597, USA. E-mail: william_hersh@qc.edu

Electronic Supplementary Information

Experimental Section

All manipulations of air-sensitive compounds were carried out either in a Vacuum Atmospheres inert atmosphere glovebox under recirculating nitrogen, or by using standard Schlenk techniques. 1H, 13C, and 31P NMR spectra were recorded on a Bruker DPX-400 spectrometer; chemical shifts are reported relative to TMS or residual hydrogens in CDCl3 ( 7.24), C6D6 ( 7.15), CD2Cl2 ( 5.32), or DMSO-d6 ( 2.49) for 1H NMR, to C6D6 at 128.0 ppm, CDCl3 at 77.0 ppm, CD2Cl2 at 53.8 ppm, or DMSO-d6 at 39.5 ppm for 13C NMR, and to external 85% H3PO4 at 0 ppm (positive values downfield) for 31P NMR. Elemental analyses were performed by Desert Analytics, Tucson, AZ. NMR line-shape analyses were carried out using gNMR (Cherwell Scientific Publishing, Inc.) on a Macintosh computer.

All solvents were treated under nitrogen. Benzene, diethyl ether, and tetrahydrofuran were distilled from sodium benzophenone ketyl. Hexane was purified by washing successively with 5% nitric acid in sulfuric acid, water, sodium bicarbonate solution, and water, and then dried over calcium chloride and distilled from *n*-butyllithium in hexane. Methylene chloride was distilled from phosphorus pentoxide. Pyridine was dried over potassium hydroxide pellets and distilled from BaO. Triethylamine and 1,2-diaminoethane were distilled under N2 from CaH2. NMR solvents were treated as follows: CDCl3 and CD2Cl2 were vacuum-transferred from phosphorus pentoxide, and C6D6 was vacuum-transferred from sodium benzophenone ketyl. The 1-hexene used for hydroformylation was passed through a column of basic alumina, stirred over sodium, vacuum-transferred, and stored under N2 in the glovebox.

The following chemicals were used as received: Cl2PCH2CH2PCl2 (Strem Chemicals), Ph2PCl and PhPCl2 (Aldrich), and butanesulfonyl chloride, 1-naphthalenesulfonyl chloride, 2-naphthalenesulfonyl chloride, 4-nitrobenzenesulfonyl chloride, and EtPCl2 (ACROS). The following compounds were prepared as previously described: **18**5,29 and Rh(CO)2(acac).30

Syntheses

***N,N*-bis(1-butanesulfonyl)-1,2-diaminoethane (1).**  To a solution of 1,2-diaminoethane (3.3 mL, 50 mmol) in 25 mL of pyridine cooled to 0 °C, *n*-butanesulfonyl chloride (13.0 mL, 100 mmol) was added dropwise via syringe and then the reaction mixture was allowed to stir at rt overnight. The resultant dark brown mixture was poured into a flask containing 30 mL of concentrated HCl and 55 g of ice. The precipitate was filtered and washed with water to give 10 g of a brown solid. This material was dissolved in 60 mL of ethanol and boiled with 2.5 g Norit for 5 min and then filtered. Water was added to the yellow solution until it became cloudy (~60 mL), and then it was warmed to redissolve the product and allowed to cool slowly to -20 °C. After filtration and washing with water, 4.7 g of light yellow solid was obtained. A second treatment failed to remove the color. Heating 4 g of this material with 1 g of Norit in 30 mL of boiling CH2Cl2 was followed by addition of hexane until the solution turned cloudy. Cooling to -20 °C gave 3.5 g of white crystals (25% yield). 1H NMR (CDCl3) 4.90 (s, br, 2H, NH), 3.30 (~1:0.5:1 A2A2X multiplet, 3*J*(CH)(NH) = 6 Hz, 4*J*(CH)(NH) = 0 Hz, 3*J*HH ≈ 6 Hz, 4H, NCH2CH2N), 3.05 (AABB, *J*HH ~8.0 Hz, 4H, SO2C*H*2), 1.80 (~quintet, *J*HH ~ 7.8 Hz, 4H, SO2CH2C*H*2), 1.46 (sextet, *J*HH = 7.7 Hz, 4H, SO2CH2CH2C*H*2), 0.96 (t, *J*HH = 7.4 Hz, 6H, SO2CH2CH2CH2C*H*3); 13C NMR (CDCl3; assignments from HETCOR) 52.72 (SO2*C*H2), 43.76 (N*C*H2), 25.59 (SO2CH2*C*H2), 21.52 (SO2CH2CH2*C*H2), 13.56 (SO2CH2CH2CH2C*H*3). Anal. Calcd for C10H24N2O4S2: C, 39.98; H, 8.05; N, 9.32. Found: C, 40.13; H, 8.34; N, 9.14.

**2-Phenyl-1,3-bis(1-butanesulfonyl)-1,3,2-diazaphospholidine (2).**  In the glovebox a solution of Et3N (632 mg, 6.25 mmol ) in 3 mL THF was added to a solution of **1** (752 mg, 2.50 mmol) in 10 mL THF, and the resultant solution was cooled for 10 min in a -35 °C freezer. A solution of PhPCl2 (447 mg, 2.50 mmol) in 3 mL of THF was then added dropwise with stirring, with immediate formation of a cloudy white mixture. The mixture was then stirred at room temperature for 1.5 h and then filtered to remove Et3NHCl. Solvent removal *in vacuo* gave a viscous yellow oil which was dissolved in 6 mL of CH2Cl2 and passed through a ~7mL pad of silica gel packed in CH2Cl2 on a 15 mL sintered glass frit. The product was eluted with 40 mL more CH2Cl2, and the solvent removed under vacuum to give 0.6 g (60% yield) of product as a clear oil. 1H NMR (CD2Cl2) 7.61 (m, 2H, PPh), 7.46 (m, 3H, PPh), 3.79 (m, 2H, C(*Ha*)HbC(*Ha*)Hb), 3.59 (m, 2H, C(Ha)*Hb*C(Ha)*Hb*), 3.17 (AABB, *J*HH ~8.0 Hz, 4H, SO2C*H*2), 1.82 (~quintet, *J*HH ~ 7.8 Hz, 4H, SO2CH2C*H*2), 1.46 (sextet, *J*HH = 7.4 Hz, 4H, SO2CH2CH2C*H*2), 0.94 (t, *J*HH = 7.3 Hz, 6H, SO2CH2CH2CH2C*H*3); 31P NMR (CD2Cl2) 91.27 ppm; 13C NMR (CD2Cl2) 138.82 (d, 1*J*PC=30.6 Hz), 131.03 (s), 129.60 (d, 2*J*PC = 21.1 Hz), 129.24 (d, 3*J*PC = 5.6 Hz), 52.96 (SO2*C*H2), 49.09 (d, 2*J*PC = 5.9 Hz, ring CH2), 25.75 (SO2CH2*C*H2), 21.90 (SO2CH2CH2*C*H2), 13.68 (SO2CH2CH2CH2*C*H3). Anal. Calcd for C16H27N2O4S2P: C, 47.28; H, 6.70; N, 6.89. Found: C, 47.36; H, 6.65; N, 6.81.

**2-Ethyl-1,3-bis(1-butanesulfonyl)-1,3,2-diazaphospholidine (3).**  A solution of EtPCl2 (203 mg, 1.55 mmol) in 1 mL of THF was added dropwise to a stirred solution of **1** (460 mg, 1.53 mmol) and 393 mg of Et3N (393 mg, 3.88 mmol) in the glovebox at room temperature. A thick white precipitate formed and the suspension was stirred for 2 h. The mixture was filtered through Celite and the solvent removed to give a pale yellow oil. Addition of ether gave a small amount of Et3NH+Cl¯ as a fine white precipitate which was filtered and the solvent stripped; more traces of white powder were visible. The oil was taken up in CH2Cl2 and filtered through a 2 mL pad of silica gel and eluted with a total of 30 mL of CH2Cl2. The solvent was removed *in vacuo* and the clear oil was allowed to stand under vacuum for 6 h to give 250 mg (46% yield) of analytically pure product. 1H NMR (CDCl3)  (m, 4H, ring CH2), 3.12 (AABB, *J*HH ~8.0 Hz, 4H, SO2C*H*2), 1.83 (~quintet, *J*HH ~ 7.8 Hz, 4H, SO2CH2C*H*2), 1.75 (dq, 3*J*HH = 7.7 Hz, 2*J*PH = 5.7 Hz, 2H, PC*H*2), 1.47 (sextet, *J*HH = 7.4 Hz, 4H, SO2CH2CH2C*H*2), 1.12 (dt, 3*J*HH = 7.8 Hz, 3*J*PH = 18.5 Hz, 3H, PCH2C*H*3), 0.96 (t, *J*HH = 7.4 Hz, 6H, SO2CH2CH2CH2C*H*3); 31P NMR (CDCl3) 111.50 ppm; 13C NMR (CDCl3) 52.12 (SO2*C*H2), 48.48 (d, 2*J*PC = 5.9 Hz, ring CH2), 27.84 (d, 1*J*PC = 28.9 Hz, PCH2), 25.37 (SO2CH2*C*H2), 21.55 (SO2CH2CH2*C*H2), 13.56 (SO2CH2CH2CH2*C*H3), 6.71 (d, 2*J*PC = 16.9 Hz, PCH2*C*H3). Anal. Calcd for C12H27N2O4S2P: C, 40.21; H, 7.59; N, 7.81. Found: C, 40.38; H, 7.59; N, 7.79.

***N,N*-(1-butanesulfonyl)-2,2-diaminobiphenyl (4).** The following procedure was based on those in literature procedures for related compounds.33,34 To a well-stirred, ice-cold solution of 2,2-diaminobiphenyl35 (0.92 g, 5 mmol) in 10 mL of pyridine was added *n*-butanesulfonyl chloride (1.3 mL, 1.57 g, 10 mmol) in one portion. The mixture was allowed to stir at room temperature for 3 days and was then poured into a mixture of 5 mL of concentrated HCl and 10 g of ice. The crude product was filtered and washed with water to give a tan solid. Crystallization from 15 mL of ethanol (cooling only to room temperature) gave 1.85 g (87 % yield) of product as a white crystalline solid. m.p. 136-137°C; 1H NMR (CDCl3) 7.69 (d, 8.0 Hz, 2H), 7.49 (td, 7.3 Hz, 2.0 Hz, 2H), 7.21-7.30 (m, 4H), 6.08 (br s, 2H, NH), 3.08 (AABB, *J*HH ~7.5 Hz, 4H, SO2C*H*2), 1.73 (m, 4H, SO2CH2C*H*2), 1.42 (sextet, *J*HH = 7.4 Hz, 4H, SO2CH2CH2C*H*2), 0.93 (t, *J*HH = 7.4 Hz, 6H, SO2CH2CH2CH2C*H*3); 13C NMR (CDCl3) 135.84 (4°), 131.38, 130.86, 127.51 (4°), 125.44, 120.15, 53.02, 25.72, 21.80, 13.89. Anal. Calcd for C20H28N2O4S2: C, 56.58; H, 6.65; N, 6.60. Found: C, 56.34; H, 6.56; N, 6.45.

**1,3-Di(1-butanesulfonyl)-2-phenyl-dibenzo[d,f]-1,3,2-diazaphosphepine (5).** Under a nitrogen atmosphere, PhPCl2 (298 mg, 1.66 mmol) was added dropwise to a solution of **4** (680 mg, 1.6 mmol) and Et3N (406 mg, 4.0 mmol) in 20 mL of THF. After stirring the resultant white suspension at room temperature for 2 hr, the Et3NHCl was removed by filtration and the solvent removed *in vacuo* to give 984 mg of product as a light yellow oil. The oil was dissolved in 1.5 mL of CH2Cl2, and 4.5 mL of hexane was layered on the solution and allowed to diffuse in at -35 °C to give a sticky solid; after a second cycle of crystallization, 550 mg (65% yield) of product was obtained as white crystals. Pumping on the crystals did not cause the CH2Cl2 to be completely removed, on the basis of the 1H NMR spectrum, and the elemental analysis fits if ~1.5% of CH2Cl2 is present (8.7 mol%). 1H NMR (CDCl3) 7.38-7.93 (m, 13H), 2.50 (m, 2H), 2.31 (m, 2H), 1.41 (m, 4H), 1.12 (m, 4H), 0.74 (m, 6H); 31P NMR (CDCl3) 127.34ppm; 13C NMR (CDCl3) 140.16 (4°), 139.04 (4°), 137.41 (d, 1*J*PC = 37 Hz, Ph C1), 137.28 (d, 2*J*PC = 5 Hz, biphenyl 4° N-*C*), 135.38 (d, 2*J*PC = 3.5 Hz, biphenyl 4° N-*C*), 133.89, 132.36 (d, 2*J*PC = 16 Hz, Ph C2), 132.28, 132.08, 131.97 (s, Ph C4), 130.91, 130.29, 130.03, 129.97, 129.91, 129.66, 128.52 (d, 3*J*PC = 9.2 Hz, Ph C3), 55.95, 53.05, 25.08, 25.03, 21.90, 21.56, 13.69. Anal. Calcd for C26H31N2O4S2P.(CH2Cl2)0.087: C, 58.18; H, 5.84; N, 5.20. Found: C, 57.90; H, 5.94; N, 5.07.

**1,3-Di(1-butanesulfonyl)-2-ethyl-dibenzo[d,f]-1,3,2-diazaphosphepine (6).** In the glovebox, EtPCl2 (62 mg, 0.48 mmol) was added to a solution of **4** (202 mg, 0.48 mmol) and Et3N (120 mg, 1.18 mmol) in 10 mL of THF. After stirring at rt for 4 h, the suspension was filtered through Celite, the solvent was removed, and the residue crystallized from 4 mL of a 4:1 mixture of hexane and CH2Cl2 at -35 °C, to give 145 mg of product (63% yield) as white crystals: 1H NMR (CDCl3)  7.3-7.8 (m, 8H), 2.69 (m, 1H), 2.42 (m, 1H), 2.30 (m, 1H), 2.14 (m, 1H), 2.03 (m, 1H), 1.86 (m, 1H), 1.42-1.28 (m, 4H), 1.31 (dt, 3*J*PH = 19.9 Hz, *J*HH = 7.7 Hz, 3 H, PCH2C*H3*), 1.10 (m, 4H, SO2CH2CH2C*H*2), 0.723 and 0.721 (overlapping t, 6H, 6.9 Hz, SO2CH2CH2CH2C*H*3); 31P NMR (CDCl3) 152.49; 13C NMR (CDCl3) 139.81, 138.91, 136.32 (d, 2*J*PC = 3.1 Hz; only one of the two expected doublets was observed), 133.62, 132.79, 130.15, 130.03, 129.98, 129.68, 129.42, 129.33, 56.21, 52.54, 24.88, 24.53, 23.29 (d, 1*J*PC = 34.5 Hz, P*C*H2), 21.52, 21.36, 13.26, 13.21, 7.00 (d, 2*J*PC = 22.3 Hz, PCH2*C*H3). Anal. Calcd for C22H31N2O4S2P: C, 54.75; H, 6.47; N, 5.80. Found: C, 54.47; H, 6.55; N, 5.65.

***N,N*-bis(4-nitrobenzenesulfonyl)-1,2-diaminoethane (7).** To a magnetically-stirred solution of 1,2-diaminoethane (468 L, 7.0 mmol) and NaOH (1.7 g, 42 mmol) in 16 mL of water at room temperature was added in one portion 4-nitrobenzenesulfonyl chloride (4.65g, 21.0 mmol), and the mixture was allowed to stir for 3.5 h. After filtration a mixture of 3.5 mL concentrated HCl and 7 g of ice was added into the yellow solution, giving a yellow precipitate which was filtered and washed with water until the filtrate was neutral, to yield 2.72 g of product as a yellow powder after air-drying. The solid was suspended in 70 mL of ethanol, heated to boiling, and then filtered out, and then the solid was treated a second time by suspending it in a boiling mixture of 55 mL MeOH and 5 mL of H2O, and filtering to give 1.3 g(43% yield) of **7** as a spectroscopically pure yellow powder; the *soluble* material removed in this manner was identified on the basis of 1H NMR as (O2NC6H4)2NCH2CH2N(H)C6H4NO2.  1H NMR (DMSO-d6)  8.38 (d, 9.0 Hz, 4H), 8.08 (br s, 2H), 7.99 (d, 9.0 Hz, 4H), 2.83 (s, 4H); 13C NMR (DMSO-d6) 149.56 (4°), 145.77 (4°), 128.02, 124.60, 42.24.

**2-Phenyl-1,3-bis(4-nitrobenzenesulfonyl)-1,3,2-diazaphospholidine (8).** In the glovebox, a solution of Et3N (263 mg, 2.60 mmol) in 3 mL of THF was added to **7** (448 mg, 1.04 mmol) in 20 mL of THF, followed by dropwise addition of a solution of PhPCl2 (186 mg, 1.04 mmol) in 3 mL of THF. The cloudy beige solution was stirred at room temperature for 1.5 hours, and then the Et3NHCl precipitate was filtered off and the solvent removed *in vacuo*. The pale yellow solid was taken up in 22 mL of THF, 4 mL of hexane was layered on, and the mixture was allowed to stand overnight at -35 °C to give the product as a powder that was still contaminated with a small amount of Et3NHCl. Analytically pure material (150 mg, 27% yield) as a pale yellow solid was obtained by taking up the product in 2 mL of CH2Cl2, filtering, and stripping the solvent. 1H NMR (CD2Cl2) 8.27 (d, 8.9 Hz, 4H), 7.97 (d, 8.9 Hz, 4H), 7.60 (m, 2H, Ph), 7.50 (m, 3H, Ph), 3.62 (m, 2H, C(*Ha*)HbC(*Ha*)Hb), 3.44 (m, 2H, C(Ha)*Hb*C(Ha)*Hb*; 31P NMR (CD2Cl2)  93.60 ppm; 13C NMR (CD2Cl2) 150.79 (NO2C6H4 4° C), 144.44 (NO2C6H4 4° C), 137.18 (d, 1*J*PC = 31.2 Hz, Ph C1), 131.79 (Ph C4), 129.79 (d, 2*J*PC = 21.9 Hz, Ph C2), 129.49 (d, 3*J*PC = 6.1 Hz, Ph C3), 128.91 (d, 4*J*PC = 2.4 Hz, NO2C6H4 CH), 124.83 (NO2C6H4 CH), 48.74 (d, 2*J*PC = 5.7 Hz). Anal. Calcd for C20H17N4O8PS2: C, 44.78; H, 3.19; N, 10.44. Found: C, 45.04; H, 3.18; N, 10.15.

***N,N*-bis(1-naphthalenesulfonyl)-1,2-diaminoethane (9a).** To an ice-cooled magnetically-stirred solution of Et3N (1.26 g, 12.5 mmol) and 1,2-diaminoethane (334 L, 5.0 mmol) in 10 mL of THF was added dropwise a solution of 1-naphthalenesulfonyl chloride (2.38 g, 10.5 mmol) in 10 mL of THF, keeping the temperature below 20°C; the mixture was stirred overnight at rt. After solvent removal on a rotary evaporator, the resultant yellow oil and solid was treated with a mixture of 1.5 mL conc. HCl and 7 g of ice to give a yellow solid. This was filtered and washed with water until the filtrate was neutral, giving 1.7 g of solid after drying. This material was dissolved in 100 mL of 4:1 acetone:ethyl acetate, boiled until it became cloudy (~25 mL), and then cooled at -20 °C to give 0.90 g (41% yield) of **9a** as a yellow powder. 1H NMR (DMSO-d6)  8.51 (dd, 8.0, 2.4 Hz, 2H), 8.20 (d, 8.4 Hz, 2H), 8.06 (dd, 6.4, 2.8 Hz, 2H), 7.99 (br s, 2H), 7.97 (d, 7.2 Hz, 2H), 7.51-7.66 (m, 6H), 2.79 (br s, 4H); 13C NMR (DMSO-d6) 134.97, 133.84, 133.81, 128.99, 128.50, 127.88, 127.30, 126.85, 124.47, 124.43, 42.00.

***N,N*-bis(2-naphthalenesulfonyl)-1,2-diaminoethane (9b).** To an ice-cooled magnetically-stirred solution of Et3N (1.26 g, 12.5 mmol) and 1,2-diaminoethane (334 L, 5.0 mmol) in 10 mL of THF was added dropwise a solution of 2-naphthalenesulfonyl chloride (2.38 g, 10.5 mmol) in 10 mL of THF, keeping the temperature below 20°C; the mixture was stirred overnight at rt. After solvent removal on a rotary evaporator, the resultant yellow powder was added to a mixture of 1.5 mL conc. HCl and 6 g of ice, and then the solid was filtered and washed with water until the filtrate was neutral, giving 2.6 g of solid after drying. This material was extracted using 2  200 mL of ethyl acetate in a Soxhlet extractor for about 5 h each; after filtration and solvent removal on a rotary evaporator, 1.5 g of yellow powder was obtained. This material was dissolved in 280 mL of 6:1 acetone:ethyl acetate, boiled down until it became cloudy (~60 mL), and then cooled at -20 °C to give 1.04 g (47% yield) of **9b** as a yellow powder. 1H NMR (DMSO-d6)  8.34 (br s, 2H), 8.09 (d, 7.6 Hz, 2H), 8.03 (d, 8.4 Hz, 2H), 7.99 (d, 8.0 Hz, 2H), 7.78 (br m, 2H), 7.63-7.71 (m, 6H), 2.79 (br s, 4H); 13C NMR (DMSO-d6) 137.13, 134.08, 131.64, 129.37, 129.13, 128.71, 127.81, 127.59, 127.29, 122.05, 42.23.

***N,N*-Bis(diphenylphosphino)-*N,N*-(1-butanesulfonyl)-1,2-diaminoethane (10).** In the glovebox, a solution of Et3N (632 mg, 6.25 mmol) in 2 mL THF was added to a solution of **1** (751 mg, 2.50 mmol) in 20 mL THF, and then a solution of Ph2PCl (1.10 g, 5.00 mmol) in 3 mL THF was added dropwise with magnetic stirring, immediately giving a white precipitate. The mixture was allowed to stir overnight at room temperature. After filtering off the Et3NHCl, solvent removal *in vacuo* gave 1.64 g of product as a light yellow solid. This was taken up in 5 mL of CH2Cl2 and 10 mL of ether was layered on. Cooling to -35 °C overnight gave 1.32 g of white crystals, and a second crystallization using 4.5 mL CH2Cl2 and 9 mL of ether in the same way gave 1.16 g (70% yield) of product as analytically pure white crystals. 1H NMR (CD2Cl2)  7.40 (m, 20H, Ph), 3.19 (br ~t, A2A2X2 m, 3*J*PH ≈ 3.2 Hz, 4H, CH2CH2), 2.86 (AABB, *J*HH ~7.9 Hz, 4H, SO2C*H*2), 1.57 (m, 4H, SO2CH2C*H*2), 1.33 (sextet, *J*HH = 7.4 Hz, 4H, SO2CH2CH2C*H*2), 0.88 (t, *J*HH = 7.3 Hz, 6H, SO2CH2CH2CH2C*H*3); 31P NMR (CD2Cl2) 59.21 ppm; 13C NMR (CD2Cl2) 135.11 (d, 1*J*PC= 16.7 Hz), 132.95 (d, 2*J*PC = 21.6 Hz), 130.26 (s, C4), 128.96 (d, 3*J*PC = 6.2 Hz), 53.74 (d, 2*J*PC = 3.1 Hz, CH2), 49.24 (SO2*C*H2), 25.58 (SO2CH2*C*H2), 21.81 (SO2CH2CH2*C*H2), 13.67 (SO2CH2CH2CH2*C*H3). Anal. Calcd for C34H42N2O4S2P2: C, 61.06; H, 6.33; N, 4.19. Found: C, 60.69; H, 6.39; N, 4.11.

***N,N*-Bis(diphenylphosphino)-*N,N*-bis(4-nitrobenzenesulfonyl)-1,2-diaminoethane (11)**. In the glovebox, a solution of Ph2PCl (354 mg, 1.6 mmol) in 2 mL of THF was added dropwise to a solution of **7** (349 mg, 0.81 mmol) and Et3N (209 mg, 2.1 mmol) in 12 mL of THF. The mixture was stirred overnight at ambient temperature and a yellow cloudy mixture was obtained. Filtration and washing with THF gave 0.59 g of a beige powder that was mixed with 5 mL of CHCl3 and then filtered to remove the CHCl3-soluble Et3NHCl and give 0.29 g of an off-white powder that was nearly spectroscopically pure. Repetition of this procedure with 5 mL more of CHCl3 gave 165 mg of **11** which was crystallized from 1:1 CH2Cl2:hexane to give spectroscopically pure material that was used for hydroformylation. 1H NMR (CD2Cl2) 8.24 (d, 8.8 Hz, 4H), 7.73 (d, 8.7 Hz, 4H), 7.43 (t, 7.4 Hz, 4H), 7.33 (dt, 1.4, 7.5 Hz, 8H), 7.24 (t, 7.4 Hz, 8H), 3.30 (s, 4H); 31P NMR (CD2Cl2)  63.64 ppm; 13C NMR (CD2Cl2) 150.48, 145.77, 134.11 (d, 1*J*PC = 17.6 Hz), 132.83 (d, 2*J*PC = 21.8 Hz), 130.56, 129.16 (d, 3*J*PC = 6.3 Hz), 129.04 (d, 4*J*PC = 2.9 Hz), 124.51, 49.66. Anal. Calcd for C38H32N4O8S2P2: C, 57.14; H, 4.04; N, 7.01. Found: C, 55.95; H, 3.81; N, 6.96.

***N,N*-Bis(diphenylphosphino)-*N,N*-bis(1-naphthalenesulfonyl)-1,2-diaminoethane (12a).** In the glovebox, a solution of Ph2PCl (447 mg, 2.0 mmol) in 2 mL of THF was added dropwise to a solution of **9a** (448 mg, 1.0 mmol) and Et3N (257 mg, 2.5 mmol) in 14 mL of THF. The resultant beige cloudy mixture was stirred overnight at rt and then was filtered to give 0.91 g of white powder. This material was mixed with 15 mL of CH2Cl2 and filtered to remove the CH2Cl2-soluble Et3NHCl, giving 0.54 g of **12a** as a white powder. A 0.18 g sample was crystallized in the air by boiling it in 25 mL CH2Cl2, filtering, adding an equal volume (20 mL) of anhydrous ether, and heating back to a boil before allowing the mixture to cool first to rt and then to -20 °C, giving 0.16 g of white crystals. Recrystallization by the same procedure gave 0.13 g (48% yield) of product that was used for hydroformylation. 1H NMR (CD2Cl2) 8.54 (d, 8.6 Hz, 2H), 8.05 (d, 8.2 Hz, 2H), 7.94 (d, 8.1 Hz, 2H), 7.90 (d, 6.8Hz, 2H), 7.57 (t, 7.1 Hz, 2H), 7.48 (dt, 1.2, 7.7 Hz, 2H), 7.39 (t, 7.8 Hz, 2H), 7.29 (t, 7.0 Hz, 4H), 7.11-7.19 (m, 16H), 3.41 (s, 4H); 31P NMR (CD2Cl2)  58.43 ppm; 13C NMR (CD2Cl2) 135.24, 134.67, 134.63, 134.48 (d, 1*J*PC = 18.1 Hz), 132.88 (d, 2*J*PC = 21.6 Hz), 131.06 (d, *J*PC = 3.0 Hz), 130.03, 129.18, 128.79 (d, 3*J*PC = 5.8 Hz), 128.54, 128.40, 127.17, 125.64 (d, *J*PC = 6.1 Hz), 124.41, 48.95. Anal. Calcd for C46H38N2O4S2P2: C, 68.30; H, 4.74; N, 3.46. Found: C, 67.38; H, 4.62; N, 3.48.

***N,N*-Bis(diphenylphosphino)-*N,N*-bis(2-naphthalenesulfonyl)-1,2-diaminoethane (12b).** In the glovebox, a solution of Et3N (408 mg, 4.0 mmol) in 2 mL of THF was added to a solution of **9b** (708 mg, 1.6 mmol) in 25 mL of THF, and then a solution of PPh2Cl (707 mg, 3.2 mmol) in 3 mL of THF was added dropwise. The cloudy mixture was stirred for 24 h, and then the precipitate was collected by filtration to give a white powder. This material was mixed with 20 mL of CH2Cl2 and filtered to remove the CH2Cl2-soluble Et3NHCl, giving 0.70 g of **12b** (54% yield) as a white powder. Crystallization of a 0.25 g sample was carried out by dissolving in 25 mL of CH2Cl2, layering on 25 mL of hexane, and cooling at -35 °C, to give 0.20 g of spectroscopically pure product as white crystals. Recrystallization by the same procedure gave analytically pure product. 1H NMR (CD2Cl2) 8.12 (s, br, 2H), 7.93 (d, 8.1 Hz, 2H), 7.85 (d, 8.4 Hz, 4H), 7.68 (t, 7.3 Hz, 2H), 7.62 (t, 7.4 Hz, 2H), 7.52 (d, 8.5 Hz, 2H), 7.36 (m, 4H, Ph), 7.25 (m, 16H, Ph), 3.34 (br ~t, A2A2X2, 3*J*PH = 3.5 Hz, 4H, CH2); 31P NMR (CD2Cl2)  61.79 ppm; 13C NMR (CD2Cl2) 137.51, 135.20, 134.94 (d, 1*J*PC = 17.7 Hz), 132.85 (d, 2*J*PC = 21.8 Hz), 132.36, 130.13 (s, Ph C4), 129.76, 129.49, 129.22, 129.10 (d, *J*PC = 2.3 Hz), 128.91 (d, 3*J*PC = 6.1 Hz), 128.18, 127.83, 122.89 (d, *J*PC = 3.0 Hz), 49.53 (d, 2*J*PC = 1.5 Hz, CH2). Anal. Calcd for C46H38N2O4S2P2: C, 68.30; H, 4.74; N, 3.46. Found: C, 68.03; H, 4.72; N, 3.42.

***N*-Ethyl-1-butanesulfonamide (13).** Butanesulfonyl chloride (7.83 g, 50 mmol) was added dropwise at 0 °C to a solution of 70% aqueous EtNH2 (3.22 g, 50 mmol) in 25 mL of pyridine. The solution was allowed to warm to room temperature and was stirred overnight. The mixture was poured into 30 mL conc. HCl with about 30 g ice and then extracted with three 50 mL portions of ether. After being dried with Na2SO4, the ether was removed to give 3.8 g pale-orange oil (46% yield) which solidified over the course of many days: 1H NMR (CDCl3)  4.5 (s, 1H, NH), 3.16 (q, 7.2 Hz, 2H, C*H2*CH3), 3.00 (AABB, *J*HH ~8.0 Hz, 2H, SO2C*H*2), 1.77 (~quintet, *J*HH ~7.8 Hz, 2H, SO2CH2C*H*2), 1.46 (sextet, *J*HH = 7.4 Hz, 2H, SO2CH2CH2C*H*2), 1.22 (t, 7.4 Hz, 3H, CH2C*H3*), 0.96 (t, *J*HH = 7.4 Hz, 3H, SO2CH2CH2CH2C*H*3); 13C NMR (CDCl3)  52.38, 38.25, 25.66, 21.56, 15.87, 13.61. Anal. Calcd for C6H15NO2S: C, 43.61; H, 9.15; N, 8.48. Found: C, 43.98; H, 9.52; N, 8.46.

***N*-Diphenylphosphino-*N*-ethyl-1-butanesulfonamide (14).** In the glovebox, Ph2PCl (1.05 g, 4.75 mmol) was added neat in 3 portions to a solution of **13** (825 mg, 5 mmol) and Et3N (606 mg, 6 mmol) in 25 mL of benzene, and the suspension was stirred for 24 h. Following solvent removal, the product was taken up in CH2Cl2 and filtered through a 5 mL plug of silica on a frit with about 20 mL of CH2Cl2. Following solvent removal, 840 mg (51% yield) of **14** as a pale orange oil was obtained: 1H NMR (CDCl3)  7.52 (m, 2H), 7.42 (m, 3H), 3.51 (dq, 3*J*PH = 2.6 Hz, 3*J*HH = 7.1 Hz, 2H, ethyl CH2), 3.14 (AABB, *J*HH ~8.0 Hz, 2H, SO2C*H*2), 1.82 (~quintet, *J*HH ~7.8 Hz, 2H, SO2CH2C*H*2), 1.45 (sextet, *J*HH = 7.4 Hz, 2H, SO2CH2CH2C*H*2), 0.94 (t, *J*HH = 7.4 Hz, 3H, SO2CH2CH2CH2C*H*3), 0.70 (t, *J* = 7.1 Hz, 3H, ethyl CH3); 31P NMR (CDCl3)  55.92; 13C NMR (CDCl3)  135.23 (d, 1*J*PC = 16.2 Hz, assigned from DEPT45), 132.43 (d, 2*J*PC = 21.5 Hz), 129.83 (s, C4), 128.68 (d, 3*J*PC = 6.1 Hz), 54.75 (d, 3*J*PC = 3.2 Hz, SO2*C*H2), 44.10 (d, 2*J*PC = 1.6 Hz, N*C*H2), 25.43, 21.59, 15.63 (NCH2*C*H3), 13.61 (SO2CH2CH2CH2C*H*3); assignments confirmed by HETCOR. Anal. Calcd for C18H24NO2SP: C, 61.87; H, 6.92; N, 4.01. Found: C, 61.75; H, 6.82; N, 4.05.

***N*-(Diphenylphosphino)-*N,N*-(1-butanesulfonyl)-2,2-diaminobiphenyl (15).** In the glovebox, PPh2Cl (100 mg, 0.45 mmol) was added to a solution of **4** (213 mg, 0.50 mmol) and Et3N (61 mg, 0.6 mmol) in 7.5 mL of THF. After stirring for 2 h, the solid Et3NHCl was removed by filtration and the solvent was removed *in vacuo*. The resultant solid was crystallized from 6 mL of a 1:5 mixture of CH2Cl2/hexane at -35 °C and then recrystallized from 4 mL of a 1:3 mixture of CH2Cl2/hexaneto give 150 mg (50% yield) of **15** as white crystals. 1H NMR (C6D6) 6.53 - 7.99 (m, 19H), 2.70 - 3.11 (m, 3H), 1.51-1.70 (m, 5H), 0.97-1.15 (m, 4H) 0.60-0.76 (m, 6H); 31P NMR (C6D6, ~21 °C)  68.17, 67.48 (~16:84); 13C NMR (C6D6)  136.12, 131.48, 130.55, 130.09, 128.95, additional peaks likely overlapping C6D6 at 128 - 129, 125.63, 122.76, 54.01, 53.62, 53.20, 25.81, 21.83, 21.68, 13.71.

***N,N*-bis(diphenylphosphino)-*N,N*-(1-butanesulfonyl)-2,2-diaminobiphenyl (16).** In the glovebox 2.75 mL of *n*-BuLi (1.6 M in hexane, 4.4 mmol) was added dropwise to a solution of **4** (850 mg, 2.0 mmol) in 20 mL of THF that had been pre-cooled at -35 °C. The mixture was stored in the glovebox freezer at -35 °C for 0.5 h, and then a solution of Ph2PCl (883 mg, 4.0 mmol) in 4 mL of THF was added dropwise. The mixture was allowed to warm to rt with stirring for 1 h, and then the THF was removed *in vacuo*. Methylene chloride (30 mL) was added to precipitate out LiCl, and the mixture was filtered through Celite and the solvent removed to give a sticky yellow solid. This material was resuspended in 8 mL of benzene, filtered through Celite, and the solvent was removed to give a yellow powder. Recrystallization from CH2Cl2/hexane (1:3) at -35 °C gave 600 mg (38% yield) of fine white crystals. 1H NMR (C6D6)  8.92 (d, 7.6 Hz, 1H), 8.08 (~t, 6.7 Hz, 5H), 7.76 (d, 8.0 Hz, 1H), 7.70 (br s, 2H), 7.45 (~t, 6.7 Hz, 1H), 7.04 - 7.25 (m, 17 H), 6.90 (t, 7.3 Hz, 1H), 2.80 (m, 1H), 2.41 (m, 1H), 1.90 (br m, 2H), 1.52 (m, 2H), 1.37 (m, 1H), 1.17 (m, 1H), 0.93 - 1.04 (m, 4H), 0.54 - 0.91 (m, 6H); 31P NMR (C6D6, ~21 °C)  70.08, 69.83, 67.99 (~4:54:42); 13C NMR (C6D6)  54.01, 140.01, 136.78, 136.24, 134.89, 131.27, 131.09, 130.51, 129.25, 129.16, additional peaks likely overlapping C6D6 at 128 - 129, 56.12, 53.87, 32.12, 25.37, 23.21, 21.89, 21.68, 14.52, 13.57. Anal. Calcd for C44H46N2O4S2P2: C, 66.65; H, 5.85; N, 3.53. Found: C, 65.16; H, 5.64; N, 3.36.

***P,P*-1,2-Ethanediylbis(1,3-di(1-butanesulfonyl)-1,3,2-diazaphospholidine)** **(19).** In the glovebox, a solution of **17** (100 mg, 0.431 mmol) in 1 mL of THF was added dropwise to a solution of **1** (259 mg, 0.862 mmol) and Et3N (219 mg, 2.16 mmol) in 6 mL of THF. The resultant thick white suspension was allowed to stir for 24 hr and was then filtered through Celite, and the solvent was removed under vacuum. Crystallization from 12 mL of ether/CH2Cl2 (3:1) at -35 °C gave 120 mg of **19** (41% yield) as a white fine crystalline powder. 1H NMR (CDCl3)  3.84 (m, 8H, ring CH2), 3.12 (AABB, *J*HH = ~7.9 Hz, 8H, SO2C*H*2), 1.89 (t, *J*PH = 8.2 Hz, 4H, bridging CH2), 1.82 (m, 8H, SO2CH2C*H*2), 1.47 (sextet, *J*HH = 7.4 Hz, 8H, SO2CH2CH2C*H*2), 0.96 (t, *J*HH = 7.4 Hz, 12 H, CH3); 31P NMR (CDCl3)  105.31; 13C NMR (CDCl3, see Figure 1)  52.28 (SO2CH2), 48.63 (ABX (~t), ring CH2, 3*J*PP = 17 Hz, PP = 0-2 Hz (at 161 MHz 31P), 2*J*PC = 5.7 Hz, 5*J*PC = 0 Hz), 26.17 (ABX, bridging CH2, 3*J*PP = 17 Hz, PP = 5.3 Hz (at 161 MHz 31P), 1*J*PC = 32.5 Hz, 2*J*PC = -14.4 Hz), 25.33 (SO2CH2*C*H2), 21.51 (SO2CH2CH2*C*H2),13.53 (SO2CH2CH2CH2*C*H3). Anal. Calcd for C22H48N4O8P2S4: C, 38.47; H, 7.04; N, 8.16. Found: C, 38.41; H, 6.87; N, 8.10.

***P,P*-1,4-Butanediylbis(1,3-di(1-butanesulfonyl)-1,3,2-diazaphospholidine)** **(20)**. In the glovebox, a solution of **18** (101 mg, 0.389 mmol) in 1 mL of THF was added dropwise to a solution of **1** (235 mg, 0.782 mmol) and Et3N (196 mg, 1.94 mmol) in 6 mL of THF. The resultant white suspension was allowed to stir for 3 hr and was then filtered through Celite, and the solvent was removed under vacuum to give an oil; addition of hexane gave a white solid, which remained after stripping. Crystallization from 4 mL of toluene at -35 °C gave 88 mg of **20** (32% yield) as a white powder. 1H NMR (CDCl3)  3.80 (m, 8H, ring CH2), 3.11 (AABB, *J*HH = ~7.9 Hz, 8H, SO2CH2), 1.82 (~quintet, *J*HH ≈ 7.8 Hz, 8H, SO2CH2C*H*2), 1.75, 1.67 (br m, 8H, bridging CH2), 1.47 (sextet, *J*HH = 7.4 Hz, 8H, SO2CH2CH2C*H*2), 0.96 (t, *J*HH = 7.4 Hz, 12 H, CH3); 31P NMR (CDCl3)  108.55; 13C NMR (CDCl3, see Figure 1)  52.21 (SO2CH2), 48.51 (ABX (~d), ring CH2, 5*J*PP = 1.6 Hz, PP = 0.8 Hz (at 161 MHz 31P), 2*J*PC = 6.0 Hz, 7*J*PC = 0 Hz), 34.54 (d, PP = 0 Hz, 1*J*CP = 30.6 Hz, C1 of chain), 25.35 (SO2CH2*C*H2), 23.57 (ABX, C2 of chain, 5*J*PP = 1.6 Hz, PP = 0.4 Hz (at 161 MHz 31P), 2*J*PC = 17 Hz, 3*J*PC = 13 Hz), 21.54 (SO2CH2CH2*C*H2), 13.56 (SO2CH2CH2CH2*C*H3). Anal. Calcd for C34H52N4O8P2S4: C, 40.32; H, 7.33; N, 7.84; Found: C, 40.15; H, 7.30; N, 7.55.

References

5 M. P. Magee, W. Luo, and W. H. Hersh, *Organometallics*, 2002, **21**, 362-372.

29 K. Diemert, W. Kuchen, and J. Kutter, *Phosphorus Sulfur*, 1983, **15**, 155-164.

30 Y. S. Varshavskii and T. G. Cherkasova, *Russian J. Inorg. Chem.*, 1967, **12**, 899.

33 R. Adams and J. Samuels, W.P., *J. Am. Chem. Soc.*, 1955, **77**, 5383-5385.

34 J. E. Dunbar, *J. Org. Chem.*, 1964, **29**, 1895-1898.

35 M. Tashiro and T. Yamato, *J. Org. Chem.*, 1979, **44**, 3037-3041.
